# Supplementary material
Source: PubMed Central journal article supplement (PMC5882540)
Supplement: NIHMS939163-supplement-2.pdf [file NIHMS939163-supplement-2.pdf]

Table S1. Patients and clinical information

| <b>Patient ID</b> | <b>Patient #</b> | <b>CTCs found</b> | <b>Histology</b> | <b>Progressing bone metastases</b> | <b>Metastasis Biopsy available</b> |
|-------------------|------------------|-------------------|------------------|------------------------------------|------------------------------------|
| Brx-107/BrTR-01   | -                | No                | ductal           | Yes                                | No                                 |
| Brx-53/BrTR-02    | 18               | Yes               | lobular          | Yes                                | Yes (soft-tissue)                  |
| Brx-09/BrTR-03    | 9                | Yes               | ductal           | No                                 | No                                 |
| Brx-29/BrTR-04    | -                | No                | lobular          | Yes                                | No                                 |
| Brx-50/BrTR-05    | 1                | Yes               | ductal           | No                                 | Yes (visceral)                     |
| BR29/BrTR-06      | 10               | Yes               | not known        | Yes                                | No                                 |
| Brx-66/BrTR-07    | 6                | Yes               | ductal           | No                                 | No                                 |
| Brx-67/BrTR-08    | 14               | Yes               | ductal           | Yes                                | No                                 |
| Brx-52/BrTR-09    | 16               | Yes               | ductal           | Yes                                | Yes (bone)                         |
| Brx-26/BrTR-10    | -                | No                | ductal           | Yes                                | No                                 |
| Brx-68/BrTR-11    | 19               | Yes               | ductal           | Yes                                | Yes (bone)                         |
| Brx-69/BrTR-12    | 13               | Yes               | ductal           | Yes                                | Yes (bone)                         |
| Brx-70/BrTR-13    | -                | No                | ductal           | No                                 | No                                 |
| Brx-71/BrTR-14    | 2                | Yes               | ductal           | No                                 | No                                 |
| Brx-72/BrTR-15    | 11               | Yes               | ductal           | Yes                                | No                                 |
| Brx-73/BrTR-16    | 3                | Yes               | lobular          | No                                 | Yes (soft-tissue)                  |
| Brx-74/BrTR-17    | 4                | Yes               | ductal and lo    | No                                 | No                                 |
| Brx-61/BrTR-18    | 8                | Yes               | ductal           | No                                 | Yes (bone)                         |
| Brx-10/BrTR-19    | 5                | Yes               | ductal           | No                                 | No                                 |
| Brx-75/BrTR-20    | -                | No                | ductal           | Yes                                | No                                 |
| Brx-78/BrTR-21    | 7                | Yes               | lobular          | No                                 | Yes (visceral)                     |
| Brx-77/BrTR-22    | -                | No                | ductal           | Yes                                | No                                 |
| Brx-79/BrTR-23    | -                | No                | ductal           | Yes                                | No                                 |
| Brx-82/BrTR-24    | 15               | Yes               | lobular          | Yes                                | Yes (bone)                         |
| Brx-83/BrTR-25    | 12               | Yes               | ductal           | Yes                                | No                                 |
| BR21/BrTR-26      | 17               | Yes               | ductal           | Yes                                | Yes (bone)                         |
| Brx-87/BrTR-27    | 21               | Yes               | ductal and lo    | Yes                                | No                                 |
| Brx-89/BrTR-28    | -                | No                | ductal           | Yes                                | No                                 |
| Brx-93/BrTR-29    | -                | No                | ductal and lo    | Yes                                | No                                 |
| Brx-97/BrTR-30    | 20               | Yes               | ductal           | Yes                                | Yes (soft-tissue)                  |
| Brx-98/BrTR-31    | 22               | Yes               | lobular          | Yes                                | No                                 |
| Brx-99/BrTR-32    | -                | No                | lobular          | No                                 | No                                 |

Table S2. Genes used to determine the AR signature. The table shows all genes that are present in at least three of the six AR-related signatures considered. In red are shown those genes that are present in at least four of the six AR-related signatures and that were chosen as the AR signature to test AR activation in CTC samples.

|         | PID AR PATHWAY | HALLMARK ANDROGEN RESPONSE | SCHAEFFER PROSTATE DEVELOPMENT 12HR | GO ANDROGEN RECEPTOR SIGNALING PATHWAY | NELSON RESPONSE TO ANDROGEN | HieronymusAR |
|---------|----------------|----------------------------|-------------------------------------|----------------------------------------|-----------------------------|--------------|
| NKX3-1  | 1              | 1                          | 0                                   | 1                                      | 1                           | 1            |
| PIAS1   | 1              | 1                          | 0                                   | 1                                      | 1                           | 0            |
| KLK3    | 1              | 1                          | 0                                   | 0                                      | 1                           | 1            |
| KLK2    | 1              | 1                          | 0                                   | 0                                      | 1                           | 1            |
| TMPRSS2 | 1              | 1                          | 0                                   | 0                                      | 1                           | 1            |
| MAF     | 0              | 1                          | 1                                   | 0                                      | 1                           | 1            |
| FKBP5   | 0              | 1                          | 1                                   | 0                                      | 1                           | 1            |
| NCOA4   | 1              | 1                          | 0                                   | 1                                      | 0                           | 0            |
| ALDH1A3 | 0              | 1                          | 1                                   | 0                                      | 1                           | 0            |
| PMEPA1  | 0              | 1                          | 0                                   | 1                                      | 1                           | 0            |
| PLPP1   | 0              | 1                          | 0                                   | 1                                      | 1                           | 0            |
| ACSL3   | 0              | 1                          | 0                                   | 0                                      | 1                           | 1            |
| ZBTB10  | 0              | 1                          | 0                                   | 0                                      | 1                           | 1            |
| ABCC4   | 0              | 1                          | 0                                   | 0                                      | 1                           | 1            |
| HERC3   | 0              | 1                          | 0                                   | 0                                      | 1                           | 1            |
| ELL2    | 0              | 1                          | 0                                   | 0                                      | 1                           | 1            |
